# Supplementary material for: Isolation of Anti-Ricin Protective Antibodies Exhibiting High Affinity from Immunized Non-Human Primates
Source: PubMed Central journal article supplement (PMC4810209; doi:10.3390/toxins8030064), 2016-03-03
Supplement: toxins-08-00064-s001.pdf [file toxins-08-00064-s001.pdf]

# Supplementary Materials: Isolation of Anti-Ricin Protective Antibodies Exhibiting High Affinity from Immunized Non-Human Primates

Tal Noy-Porat, Ronit Rosenfeld, Naomi Ariel, Eyal Epstein, Ron Alcalay, Anat Zvi, Chanoch Kronman, Arie Ordentlich and Ohad Mazor

| <u>primer</u>                                       | <u>sequence</u>                                           |
|-----------------------------------------------------|-----------------------------------------------------------|
| <b><u>VH amplification</u></b>                      |                                                           |
| Lib-H1 F                                            | CTTTCTATGCGGCCAGCCGGCCATGGCCAGGAGCAGCTGGTGCAGTC           |
| Lib-H2 F                                            | CTTTCTATGCGGCCAGCCGGCCATGGCCAGGTCCAGCTGGTGSAGWC           |
| Lib-H3 F                                            | CTTTCTATGCGGCCAGCCGGCCATGGCCAGGTSCAGCTCGAGSAGTC           |
| Lib-H4 F                                            | CTTTCTATGCGGCCAGCCGGCCATGGCCAGGTGCAGCTGCAGGAGTC           |
| Lib-H5 F                                            | CTTTCTATGCGGCCAGCCGGCCATGGCCAGGTGCAGCTGCAGSAGTC           |
| Lib-H6 F                                            | CTTTCTATGCGGCCAGCCGGCCATGGCCAGGTGCAGCTRCICGAGTIS          |
| Lib-H7 F                                            | CTTTCTATGCGGCCAGCCGGCCATGGCCAGGTSCAGCTGGTGCAGTY           |
| Lib-H8 F                                            | CTTTCTATGCGGCCAGCCGGCCATGGCCAGGTSACTTTGAAGGAGTC           |
| Lib-H9 F                                            | CTTTCTATGCGGCCAGCCGGCCATGGCCAGGTCCAGCTGCAGGAAAQ           |
| Lib-H10 F                                           | CTTTCTATGCGGCCAGCCGGCCATGGCCAGGTGCAGYGGTGGAGWC            |
| Lib-H11 F                                           | CTTTCTATGCGGCCAGCCGGCCATGGCCAGGTTCAGYGGTGGAAIC            |
| Lib-H12 F                                           | CTTTCTATGCGGCCAGCCGGCCATGGCCAGGTGCAGCTGGTGSARIC           |
| Lib-H13 F                                           | CTTTCTATGCGGCCAGCCGGCCATGGCCAGGTGCAGCTGGYRGAGTC           |
| Lib-H14 F                                           | CTTTCTATGCGGCCAGCCGGCCATGGCCAGGTGCAGYGGTGGAGTC            |
| Lib-H15 F                                           | CTTTCTATGCGGCCAGCCGGCCATGGCCAGGTGCAGCTCGAGGAGTC           |
| Lib-H16 F                                           | CTTTCTATGCGGCCAGCCGGCCATGGCCAGGTGCAGCTGCTCGAGTC           |
| VH rev1                                             | CACCGGATCCTCCTCCTCTGCTGAGCCTGARGAGRCTGTGACC               |
| VH rev2                                             | CACCGGATCCTCCTCCTCTGCTGAGCCTGAGGACACGCAACC                |
| <b><u>Vk amplification</u></b>                      |                                                           |
| Lib-K1 F                                            | TCCGGTGGTGGTGGTTCTGGCGGCGGCGGCTCCGATAITGIGATGAYCCAGAC     |
| Lib-K2 F                                            | TCCGGTGGTGGTGGTTCTGGCGGCGGCGGCTCCGATACTGTGATGACCCAGAC     |
| Lib-K3 F                                            | TCCGGTGGTGGTGGTTCTGGCGGCGGCGGCTCCGATAIYGAGCTCACBCAGTC     |
| Lib-K4 F                                            | TCCGGTGGTGGTGGTTCTGGCGGCGGCGGCTCCGATGTTGYRATGACTCAGTC     |
| Lib-K5 F                                            | TCCGGTGGTGGTGGTTCTGGCGGCGGCGGCTCCGACATTCAGMTGWCCAGTC      |
| Lib-K6 F                                            | TCCGGTGGTGGTGGTTCTGGCGGCGGCGGCTCCGACGTTGAGATGACCCAGTC     |
| Lib-K7 F                                            | TCCGGTGGTGGTGGTTCTGGCGGCGGCGGCTCCGACATCCAGATGACCCAGTC     |
| Lib-K8 F                                            | TCCGGTGGTGGTGGTTCTGGCGGCGGCGGCTCCGAGCTCCWGTATGACMCAGTC    |
| Lib-K9 F                                            | TCCGGTGGTGGTGGTTCTGGCGGCGGCGGCTCCGAAATWGTATGACCCAGTC      |
| Lib-K10 F                                           | TCCGGTGGTGGTGGTTCTGGCGGCGGCGGCTCCGAAATCCGAGCTCACRCAGTC    |
| Lib-K11 F                                           | TCCGGTGGTGGTGGTTCTGGCGGCGGCGGCTCCGAAATATATGACTCAGTC       |
| Lib-K12 F                                           | TCCGGTGGTGGTGGTTCTGGCGGCGGCGGCTCCGACATCCGAGCTCACCCAGTC    |
| Lib-K13 F                                           | TCCGGTGGTGGTGGTTCTGGCGGCGGCGGCTCCGAGCTCGTGTGACACAGTC      |
| Lib-K1 Rev                                          | GATACCGGTGATTTGCGCCACCTGCGGCCGCTTTGAKATCCAGTTTGGTCCCGGG   |
| Lib-K2 Rev                                          | GATACCGGTGATTTGCGCCACCTGCGGCCGCTTTGAYCTCCACCYTGGTCCCTCC   |
| Lib-K3 Rev                                          | GATACCGGTGATTTGCGCCACCTGCGGCCGCTTTGATSTCCACTTTGGTCCCTTG   |
| Lib-K4 Rev                                          | GATACCGGTGATTTGCGCCACCTGCGGCCGCTTYGATITCCACCYTGGTCCCTTG   |
| Lib-K5 Rev                                          | GATACCGGTGATTTGCGCCACCTGCGGCCGCTTTGATITCCACTTTGGTCCCGTG   |
| Lib-K6 Rev                                          | GATACCGGTGATTTGCGCCACCTGCGGCCGCTTTTATGATACCACCTTGGTCCCTTG |
| <b><u>Vλ amplification</u></b>                      |                                                           |
| Lib-L1 F                                            | TCCGGTGGTGGTGGTTCTGGCGGCGGCGGCTCCAGCCAGKGGCTGACTCAGCC     |
| Lib-L2 F                                            | TCCGGTGGTGGTGGTTCTGGCGGCGGCGGCTCCAGCCTGKGGCTGACTCAGYC     |
| Lib-L3 F                                            | TCCGGTGGTGGTGGTTCTGGCGGCGGCGGCTCCAGTCTGTGYTGACRCAGCC      |
| Lib-L4 F                                            | TCCGGTGGTGGTGGTTCTGGCGGCGGCGGCTCCAGTCTGCCCTGACTCAGCC      |
| Lib-L5 F                                            | TCCGGTGGTGGTGGTTCTGGCGGCGGCGGCTCCAGTCTGCCCCGAYTCAGYC      |
| Lib-L6 F                                            | TCCGGTGGTGGTGGTTCTGGCGGCGGCGGCTCCAGGCTGCCYGACTCAGYC       |
| Lib-L7 F                                            | TCCGGTGGTGGTGGTTCTGGCGGCGGCGGCTCCAGGCAAGGCTGACTCAGCC      |
| Lib-L8 F                                            | TCCGGTGGTGGTGGTTCTGGCGGCGGCGGCTCCAGACTGTGGTGGACCCAGGA     |
| Lib-L9 F                                            | TCCGGTGGTGGTGGTTCTGGCGGCGGCGGCTCCAAGCCTAIGCTGACTCAGCC     |
| Lib-L10 F                                           | TCCGGTGGTGGTGGTTCTGGCGGCGGCGGCTCCCTCTGTRGCTGACTCAGGA      |
| Lib-L11 F                                           | TCCGGTGGTGGTGGTTCTGGCGGCGGCGGCTCCCTATGAGCTGACWCAGCC       |
| Lib-L12 F                                           | TCCGGTGGTGGTGGTTCTGGCGGCGGCGGCTCCGAGSCTGTGCTGACTCAGCC     |
| Lib-L13 F                                           | TCCGGTGGTGGTGGTTCTGGCGGCGGCGGCTCCGAGCCTGTGCTGACTCARYC     |
| Lib-L1 Rev                                          | CCGGTGTATTTGCGCCACCTGCGGCCGCTAGRACGRTSAGCCGGGTC           |
| Lib-L2 Rev                                          | CCGGTGTATTTGCGCCACCTGCGGCCGCGAGGAYGGTCAAYTTGGTG           |
| <b><u>Linker addition primer for</u></b>            |                                                           |
| Forward 2                                           | TCACAGTCTCCTCAGGCTCAGCAGGAGGAGGAGGATCCGGTGGTGGTGGTTCTGG   |
| <b><u>Primers for scFv assembly</u></b>             |                                                           |
| ASS1 For                                            | CTTTCTATGCGGCCAGC                                         |
| ASS1 Rev                                            | GATACCGGTGATTTGCG                                         |
| <b><u>Primers for colony PCR and sequencing</u></b> |                                                           |
| TAB-RI For                                          | CCATGATTACGCCAAGCTTTGGAGCC                                |
| CBD-AS Rev                                          | GAATTC AACCTTCAAATGGC                                     |

Figure S1. Primers designed for scFv library construction.

```

MH2  EVQLVESGGGLAKPGGSLRLSCAASGFTFSDDY - MDWVRQAPGKGLEWV S -- RI SNGGGS
MH75  QEQLVQSGGGLAKPGGSLRLSCADS GFTFSDDY - MDWVRQAPGKGLEWV S -- RI STGGGT
MH76  QVQLQESGGGLAKPGGSLRLSCAAS GFTFSDDY - MDWVRQAPGKGLDWWV S -- RI SNGGGT
MH1   QLQLQESGGGLVKPSETLSLTCAVSGGSLSS - NYWSWIRQPPGKGLEWV G -- SI YGSGTGN
MH36  EVQLVESGGGLVQPGGSLRLSCAASGFTFSNVD - MNWVRQTPGKGLEWV ARIKVKADGGT
MH74  EVQLVQSGAEVKRPGESLKISCKTSGYSFTSYW - ISWVRQMPGKGLEWVG -- AT DPTDSD
MH49  EAQLVESGGGLVKPSETLSLTCAVSGGSLSS - NYWSWIRQPPGKGLEWV G -- SI YGSSGS
MH73  QVQLQESGGGLVKPSETLSLTCAVSGGSLSS - NYWSWIRQAPGKGLEWV G -- HI FGGGGG
MH77  QVQLLESPPGLVKPSETLSLTCTVSGGSLSS - NYWSWIRQAPGKGLEWV G -- YI TTSNGA
MH67  QVQLLESGPGLVKPSETLSLTCAVSGGSLSS - YWVGWIRQPPGKGLEWV G -- SI YGSSGS

MH2  KWFYADSVKGRFTISRENAKNTLYDQMNSLR AEDTAVYYCAEVP TGY S - - - QGVWGGPVL
MH75  TWYFADSVKGRFTISRENAKNTLYDQMNSLR GEDTAVYYCAKVP TGY S - - - QGVWGGPVL
MH76  TWYFADSVKGRFTISRENAKNTLYDQMNSLR PEDTAVYYCATVP TAT S G - - - IGVWGGPVL
MH1   TYYNPSSLKSRVTISDTSKNQSLKVSSTVAADTAIYYCARARS GTLWF - - - LEFVGGQAP
MH36  ADWYADSVKGRFTISRDDSKNTLYDQMNSLKT EDTAVYYCTTEEITVAR - - - YDYWGGQVL
MH74  TRYNPSSFQGVVTSADKSI STAYLQWSRLKAS DTAIYYCAKSDWSDY YGNSLDVWGRGVL
MH49  TEYNPSSLKSRATI SRDTSKNQFSLKLSSTVAADTAVYYCARQIQFLTDA - - - FDFWGGQLR
MH73  TDYNPSSLKSRVTISDTSKNQFSLKLSLAAADTAVYYCARAAIMYPNR - - - FDFWGGPVL
MH77  TYYNPSSLKSRVTISDTSKNQFSLKLSSTVAADTAVYYCARGYSNWDNWD - - - FDFWGGPVL
MH67  TEYNPSSLKSRATI SRDTSKNQFSLKLSSTVAADTAVYYCARQIQFLTDA - - - FDFWGGQLR

MH2  FTVSSQSVLTQ - PQSVSVSPGQTARI TSCGGD - - NIG - SKNVHWYQKQP PQA PVLVIYAGT
MH75  VTASSQSVLTQ - PQSVSVSPGQTARI TSCGGD - - NIG - SKNVHWYQKQP PQA PVLVIYAET
MH76  VTASSQPGLTQ - PHSVSVSPGQTARI TSCGGD - - NIG - SKNVHWYQKQP PQA PVLVIYADS
MH1   VTASSQPVL TQ - PRSVSVSPGQTARI TSCGGD - - NIG - SKS VQWYQKQP PQA PVLVIYADS
MH36  VTVSSQSVLTQ - PPSVSGAPGQSVT I SCGSSS N I R - GNG VHWYQQLS GMAPKLLIYNNN
MH74  VTASSQSVLTQ - PPSVSGAPGQSVT I SCTGSNS N I GAGY VQWYQQLP GTAPKLLIYENN
MH49  VTVSSQPGLTQ - PPSVSGAPGQSVT I SCGSSS D I G - SHD VHWYQQLP GTAPKLLIYYSN
MH73  VTASSELLMTQSPSSLSASVGDRTVITCRAS - QNIY - - SNLAWYQKQP GKTPKLLIYAAS
MH77  VTVSSDIQMSQSPSSLSASVGDKVTITCQAS - QSVS - - SWLAWYRQKPGKAPKPLIYKAS
MH67  VTASSDIQLTQSPSSVSAVGDRTVITCRAS - QAIS - - TYLAWYLRQRP GKAPPELLIYYAT

MH2  ERPSGIPERFSGSN SGNATLTI SGVEAGDEADY YCQVWDGTR EHV LFGGGTRLTVL -
MH75  ERPSGIPERFSGSN SGNATLTI SGVEAGDEADY YCQVWDGSS AHV LFA GGTRLTVL -
MH76  ERPSGIPERFSGSN SGNATLTI SGVEAGDEADY YCQVWDS SS NHV LFGGGTRLTVL -
MH1   ERPSGIPERFSGSN SGNATLTI SGVEAGDEADY YCQVWDS SS DHV LFGGGTRLTVLA
MH36  QRPSGVDRFSGSKSGT SASLATITGLQSEDEADY YCEAWDNL S GGL FGGGTRLTVLA
MH74  KRPSGVDRFSGSKSGT SASLTIITGLQSEDEADY YCQSYDSS L SVL FGGGTRLTVL -
MH49  QRPSGVDRISGSKSGT SASLTI SGLRSEDEADY YCETWENSL S GPFV FGGGTRLTVLA
MH73  ILQSGIPSRFSGSGSGTDYTLTI TNLQPEDFGT YCQQGF GIP - - YTFGQGTKVEFK -
MH77  SLEGGVPSRFSGSGSGTDFTLTINS LQPEDFAT YCQQYNSVP - - YSFGHGTKVDIK -
MH67  TLHTGVASGLTGS GSGTDFTLTLSALQPV DGT YCQQF KTL P - - YTFGQGTKVDIKA
    
```

Figure S2. Multiple alignment of the scFv sequences.

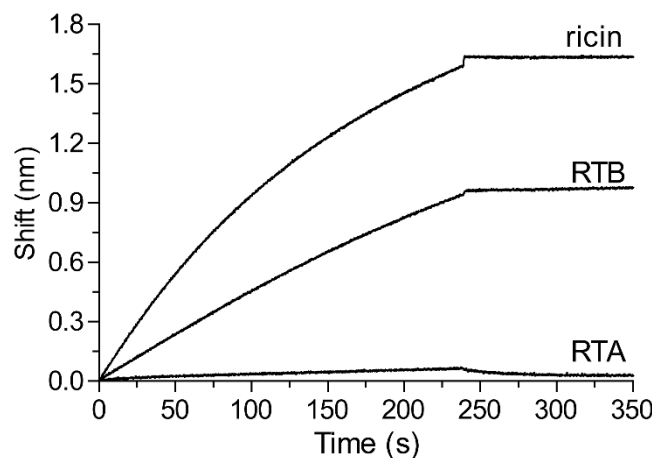

Figure S3. Binding of antibody MH73 to ricin chain B.
